# Supplementary material for: Well-defined surface tungstenocarbyne complex through the reaction of [W(CtBu)(CH2tBu)3] with CeO2: a highly stable precatalyst for NOx reduction with NH3
Source: Royal Society of Chemistry journal article supplement (doi:10.1039/d0nj02146f), 2021-01-01
Supplement: d0nj02146f1.pdf [file d0nj02146f1.pdf]

## Well-Defined Surface Tungstenocarbonyne complex through the Reaction of $[\text{W}(\equiv\text{C}t\text{Bu})(\text{CH}_2t\text{Bu})_3]$ with $\text{CeO}_2$ : a highly and stable precatalyst for $\text{NO}_x$ reduction with $\text{NH}_3$

Cherif Larabi,<sup>a</sup> Cuiriong Chen,<sup>a</sup> Nicolas Merle,<sup>a,b</sup> Marc Charlin,<sup>a</sup> Kai C. Szeto,<sup>a</sup> Aimery de Mallmann,<sup>a</sup> Anas Benayad,<sup>c</sup> Karima B. Meziane,<sup>b</sup> Akim Kaddouri,<sup>d</sup> Hai P. Nguyen<sup>\*e</sup> and Mostafa Taoufik<sup>\*a</sup>

- 
- a. Université Lyon 1, Institut de Chimie Lyon, CPE Lyon CNRS, UMR 5128 CP2M, PCM, 43 Bd du 11 Novembre 1918, 69616 Villeurbanne Cedex, France.
  - b. Université de Lille, CNRS, UMR 8516 - LASIRE - Laboratoire de Spectroscopie pour les Interactions, la Réactivité et l'Environnement, F-59000 Lille, France
  - c. Université Grenoble Alpes, CEA-LITEN, 17 rue des Martyrs, 38054 Grenoble Cedex 9, France.
  - d. Université Lyon 1 - CNRS, UMR 5256, IRCELYON, 2 Avenue Albert Einstein, F-69626 Villeurbanne, France.
  - e. Toyota Motor Europe, 1930 Zaventem, Belgium.

### Supporting Information

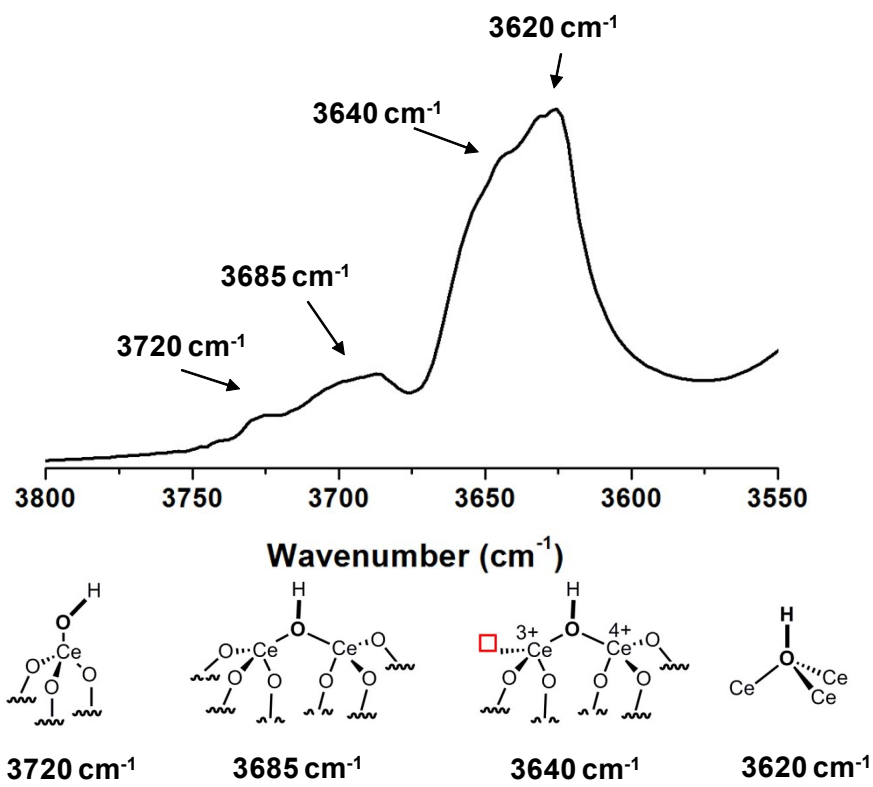

**Fig S1:** Attribution of (CeO-H) Stretching vibration according to literature.<sup>1,2</sup>

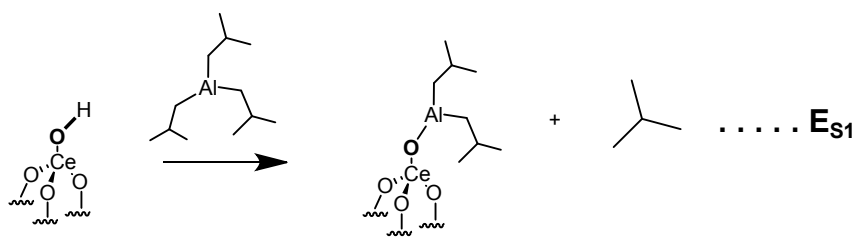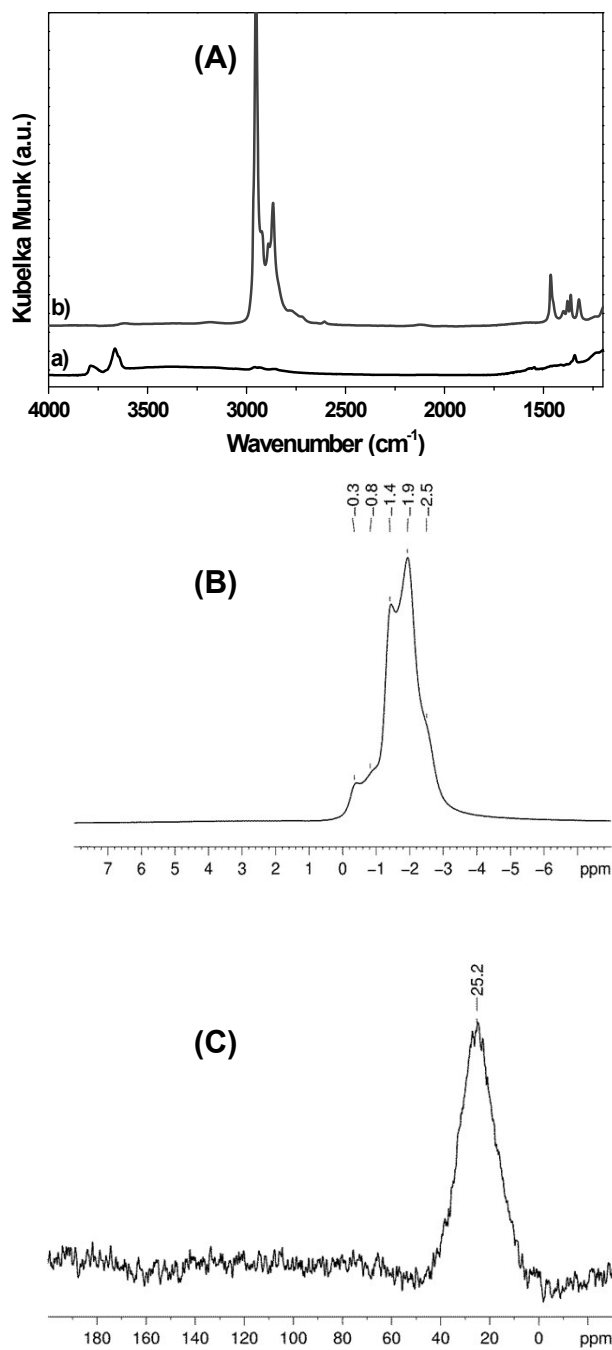

**Fig S2:** Titration of surface OH of the ceria partially dehydroxylated at 200 °C with  $\text{Al}(\text{iBu})_3$  ( $\text{E}_{\text{S1}}$ ), DRIFT spectrum of a)  $\text{CeO}_2$  dehydroxylated at 200 °C. b) after grafting of  $\text{Al}(\text{iBu})_3$  (A). This confirms that all types of the surface OH groups have reacted. Hence the quantification of surface OH groups with  $\text{Al}(\text{iBu})_3$  gives 0.7 mmol OH/g.  $^1\text{H}$  MAS (B) and  $^{13}\text{C}$  (C), NMR spectra of  $\text{Al}(\text{iBu})_3/\text{CeO}_2$ . The solid state NMR also shows the presence of isobutyl group.

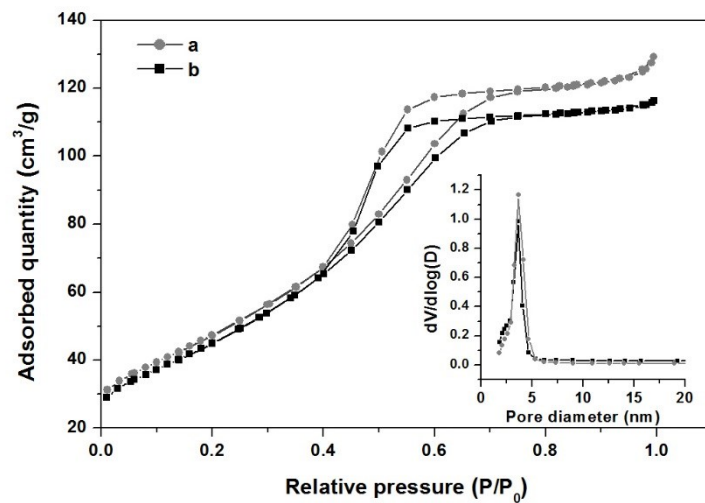

**Fig S3:** Nitrogen physisorption isotherms and corresponding pore size distribution (inset) of CeO<sub>2-200</sub> (a) and W(=C<sup>t</sup>Bu)(CH<sub>2</sub><sup>t</sup>Bu)<sub>3</sub>/CeO<sub>2-200</sub> (b).

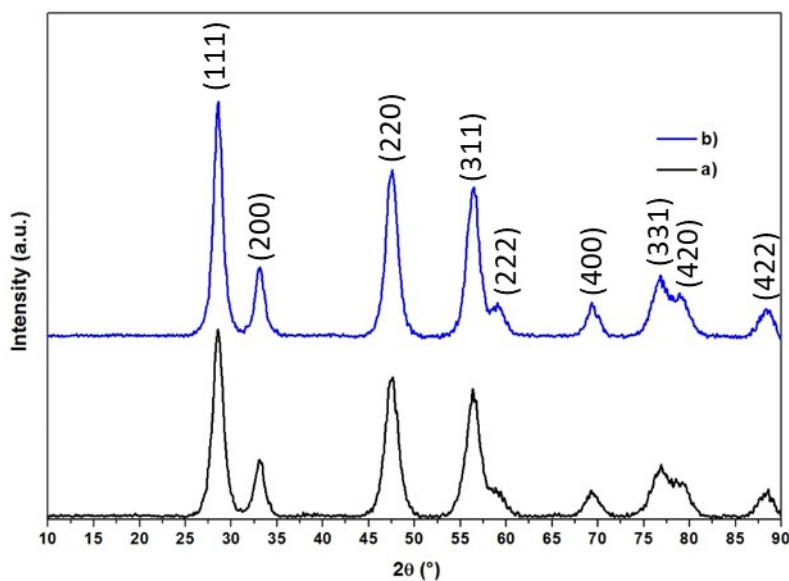

**Fig S4:** Powder X-Ray diffraction of the CeO<sub>2-200</sub> (a) and W(≡CtBu)(CH<sub>2</sub>tBu)<sub>3</sub>/CeO<sub>2-200</sub> (b). These data fit well with CeO<sub>2</sub> exhibiting a fluorite structure (JCPDS 34-0394).

**Table S1** average particle size of ceria samples calcined at various temperatures, estimated measured using Scherrer's equation

| Sample                                                           | Average crystallite size<br>a) | Surface area <sup>b)</sup>          | BET                                 |
|------------------------------------------------------------------|--------------------------------|-------------------------------------|-------------------------------------|
| CeO <sub>2-200</sub>                                             | 45 (Å)                         | 173 m <sup>2</sup> .g <sup>-1</sup> | 205 m <sup>2</sup> .g <sup>-1</sup> |
| W(≡CtBu)(CH <sub>2</sub> tBu) <sub>3</sub> /CeO <sub>2-200</sub> | 52 (Å)                         | 155 m <sup>2</sup> .g <sup>-1</sup> | 190 m <sup>2</sup> .g <sup>-1</sup> |

<sup>a)</sup>The average size of the crystallites was calculated using the following equation (Scherrer's equation):

$$T = \frac{0.9 \times \lambda}{\cos \theta \times \sqrt{H^2 - H'^2}}, \text{ where:}$$

T - size of the particles (Å)

λ - X-Ray wavelength (Å).

θ - Bragg angle.

H - full width at half maximum (FWHM) of the measured line.

H' - full width at half maximum (FWHM) of the instrument's response.

<sup>b)</sup>The surface area is calculated assuming that the particles have a perfect spherical shape,  $S = 60000/\rho \times d$  where:

ρ - Specific gravity of ceria (7.215 g.cm<sup>-3</sup>)

d - Particle diameter (Å°).

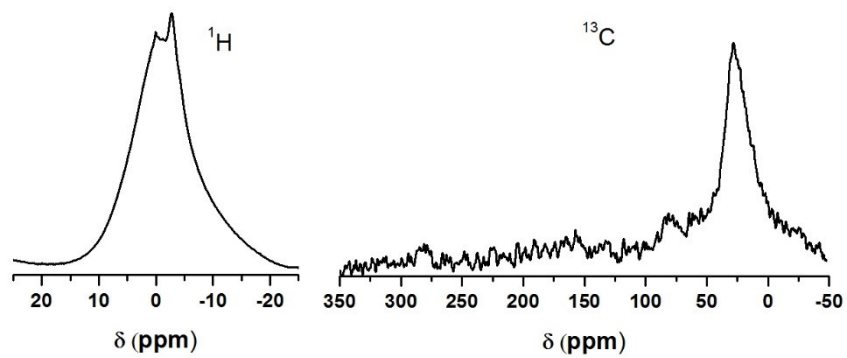

**Fig S5:**  $^1\text{H}$  MAS (left) and  $^{13}\text{C}$  (right), NMR spectra of  $\text{W}(\equiv\text{CtBu})(\text{CH}_2\text{tBu})_3/\text{CeO}_{2-200}$

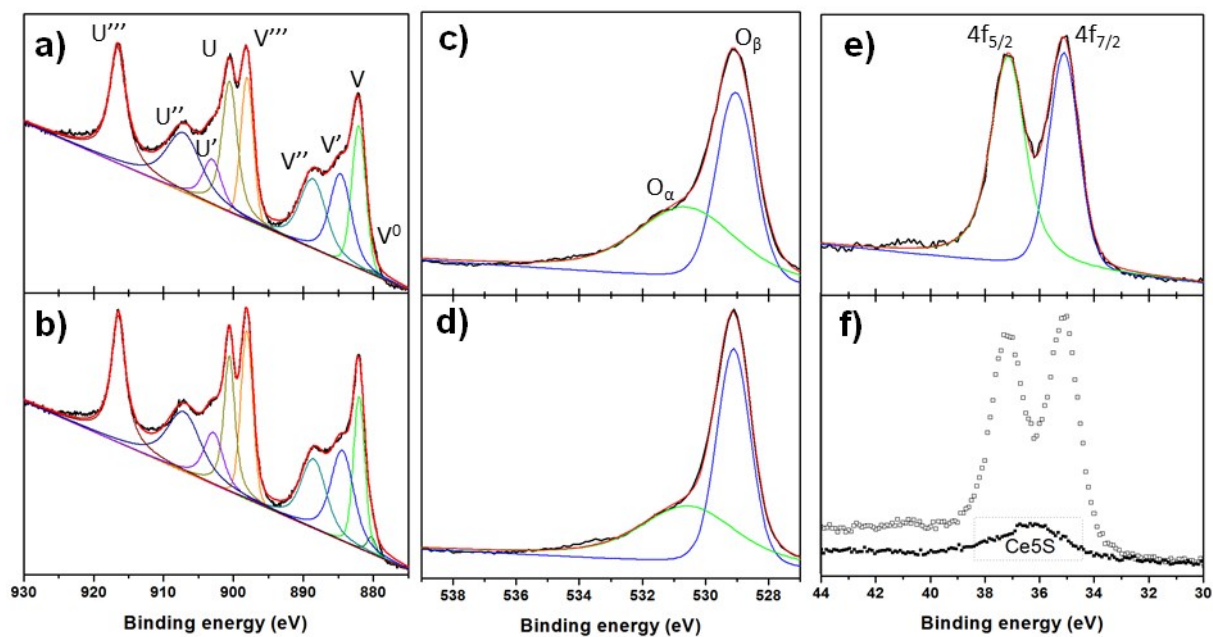

**Fig S6** : XPS spectra of CeO<sub>2-200</sub>; Ce3d (a), O1s (c) and W(≡tBu)(CH<sub>2</sub>tBu)<sub>3</sub>/CeO<sub>2</sub> catalyst; Ce3d (b), O1s (d), W4f (e). f) Shows the overlap of Ce5S signal of neat ceria and W4f of the catalyst.

**Table S2** Surface atom concentration of different elements estimated by XPS of CeO<sub>2-200</sub> and W(≡tBu)(CH<sub>2</sub>tBu)<sub>3</sub>/CeO<sub>2</sub> catalyst.

| Samples                                                     | O <sub>α</sub> /(O <sub>α</sub> + O <sub>β</sub> ) % | Ce <sup>3+</sup> /(Ce <sup>4+</sup> + Ce <sup>3+</sup> )% |
|-------------------------------------------------------------|------------------------------------------------------|-----------------------------------------------------------|
| Ceria (CeO <sub>2-200</sub> )                               | 45                                                   | 32                                                        |
| W(≡tBu)(CH <sub>2</sub> tBu) <sub>3</sub> /CeO <sub>2</sub> | 37                                                   | 34                                                        |

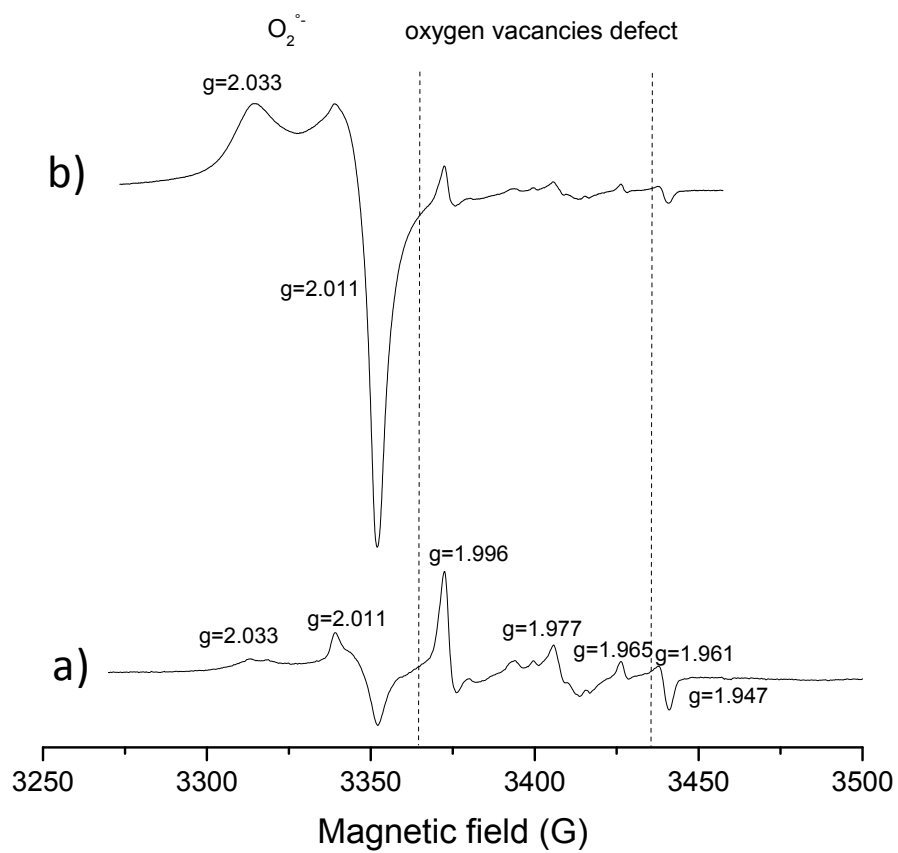

**Fig S7:** CW EPR spectra of  $W(\equiv\text{CtBu})(\text{CH}_2\text{tBu})_3/\text{CeO}_{2-200}$  recorded at room temperature with microwave power of 1.6mW (a) and 0.6mW (b)



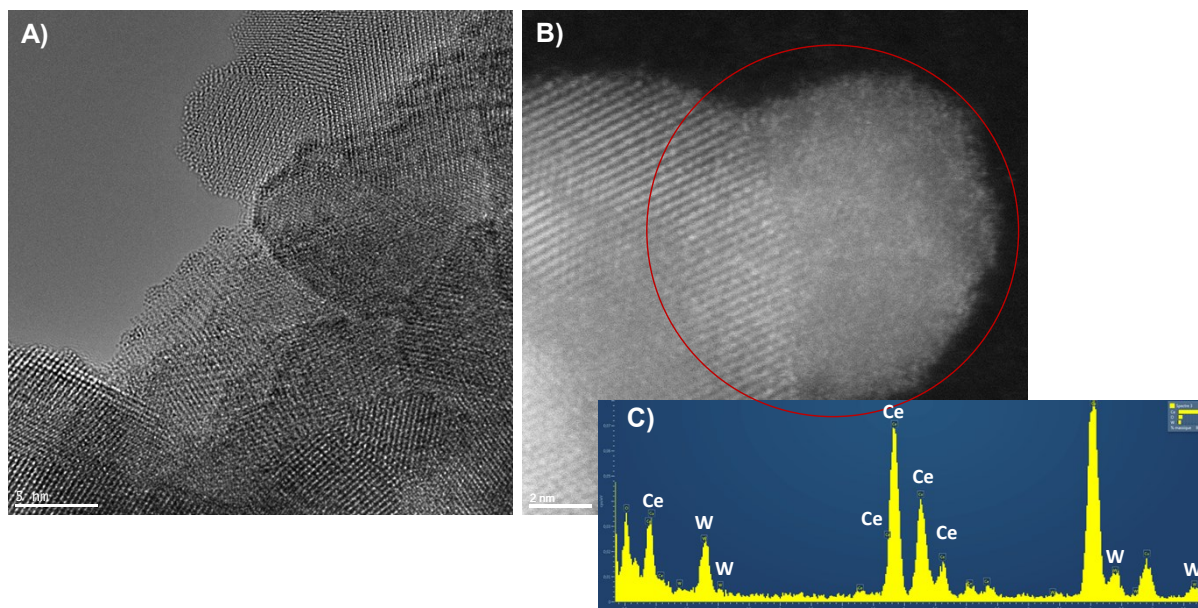

**Fig S8** : HRTEM (a), STEM (b) and EDX analysis (c) of  $W(=CtBu)(CH_2tBu)_3/CeO_2$ .

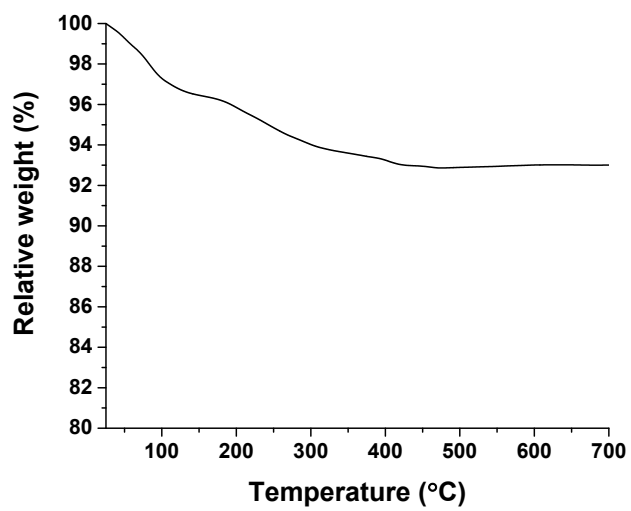

**Fig S9** : TGA curve of  $W(\equiv C t B u)(C H_2 t B u)_3 / C e O_2$  under air (heating rate:  $10\text{ }^\circ C / \text{min}$ )

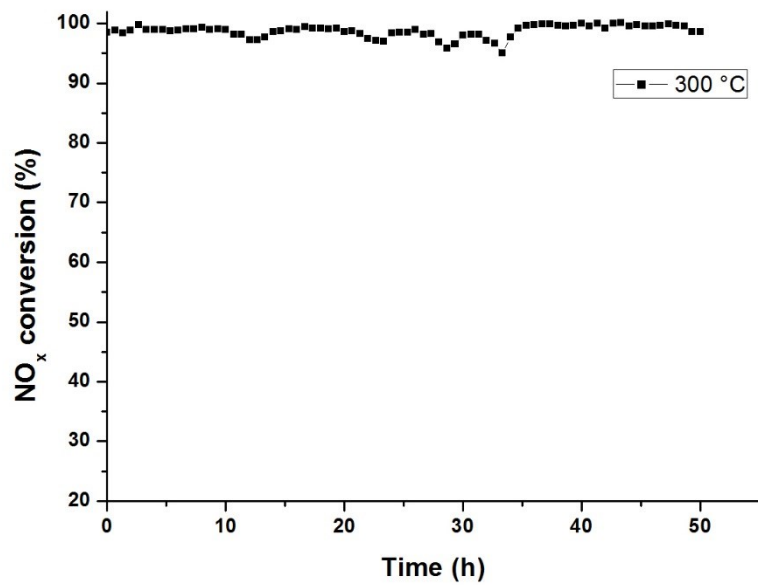

**Fig S10** : Long terms catalytic stability for NH<sub>3</sub>-SCR test of 1.

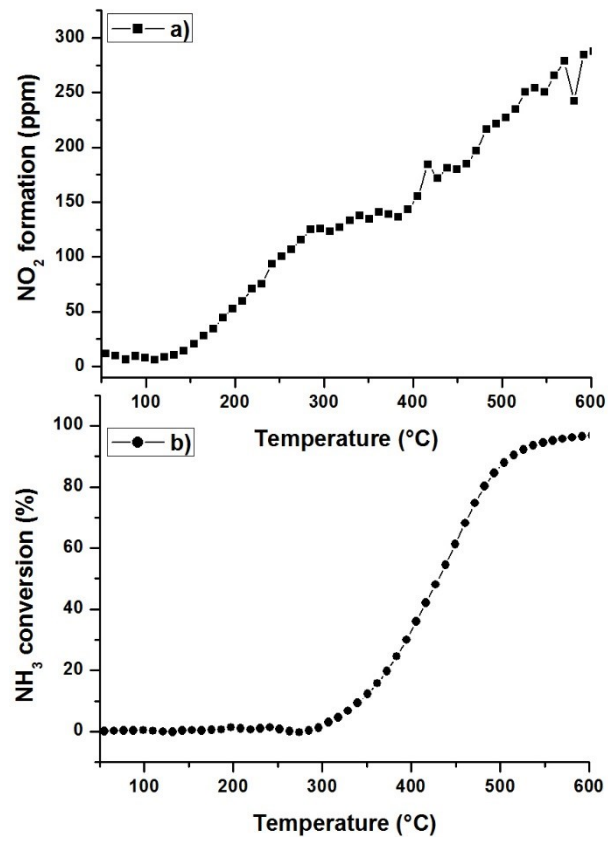

**Fig S11** : Separate oxidation reaction of NO into NO<sub>2</sub> (a) and NH<sub>3</sub> (b) over 1.

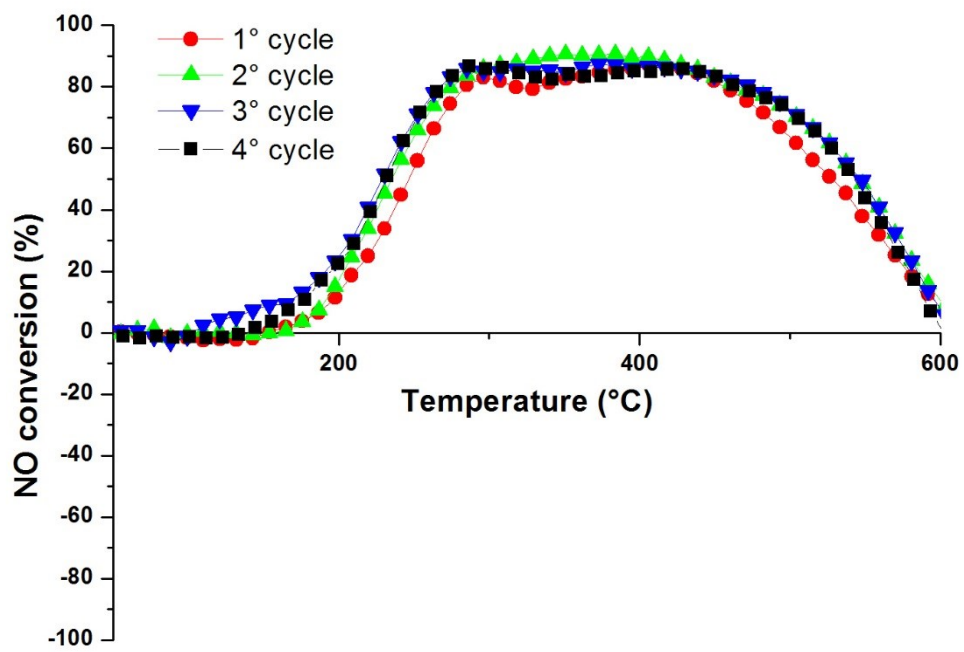

**Fig S12** : Recyclability of **2**, catalyst prepared by conventional method
